# Supplementary material for: Endocannabinoid Signaling Regulates Sleep Stability
Source: PubMed Central journal article supplement (PMC4816426; doi:10.1371/journal.pone.0152473), 2016-03-31
Supplement: pone.0152473.s006.pdf [file pone.0152473.s006.pdf]

**Dark Photoperiod**  
(ZT 12:00 → 23:59)

**Light Photoperiod**  
(ZT 00:00 → 11:59)

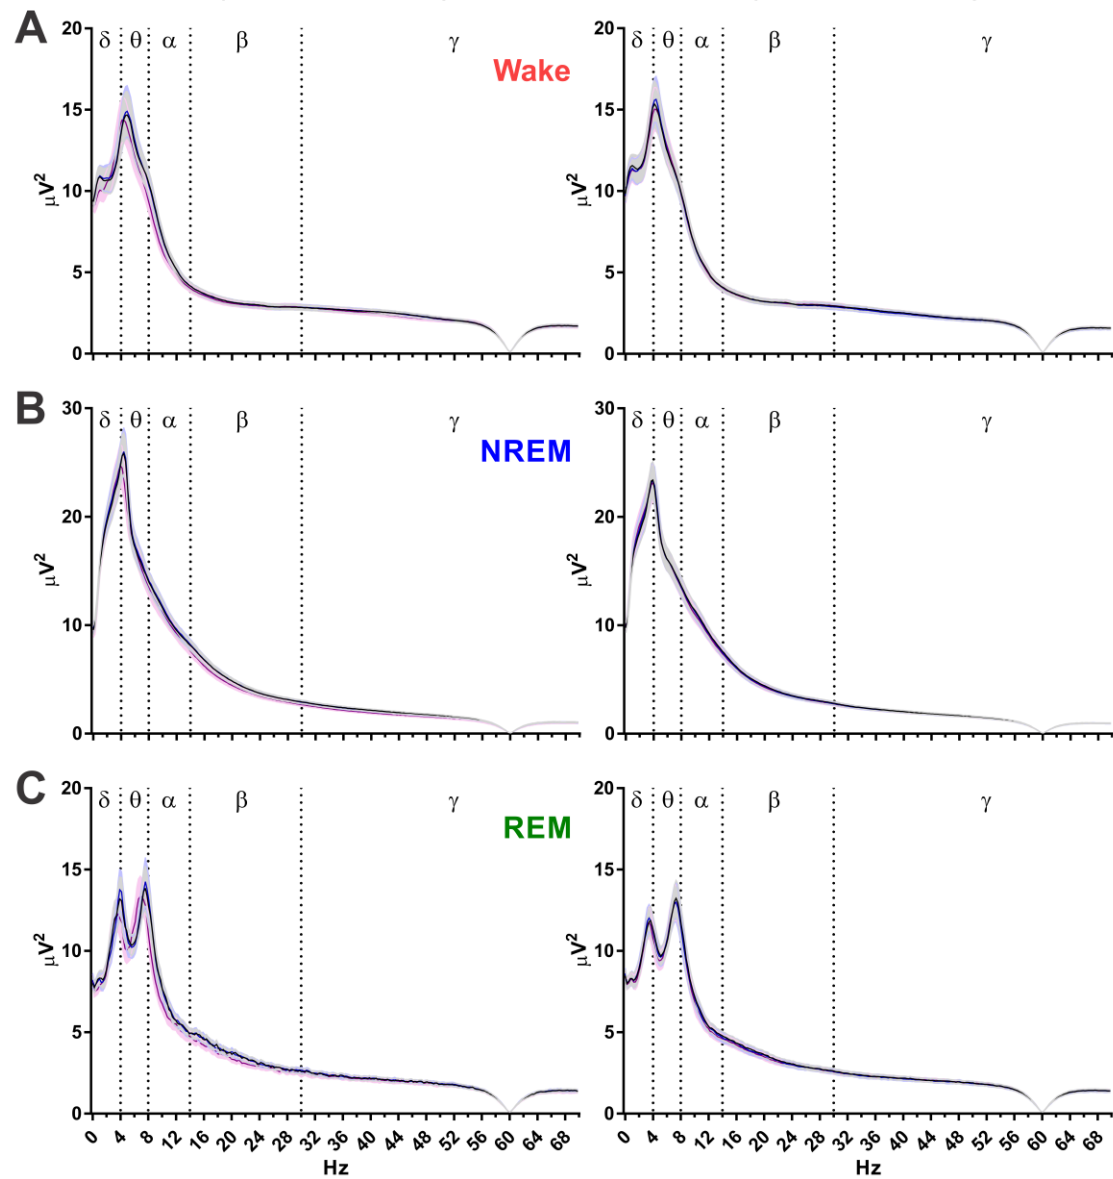

— Vehicle    — 0.1 mg/kg CP47,497    — 1.0 mg/kg CP47,497

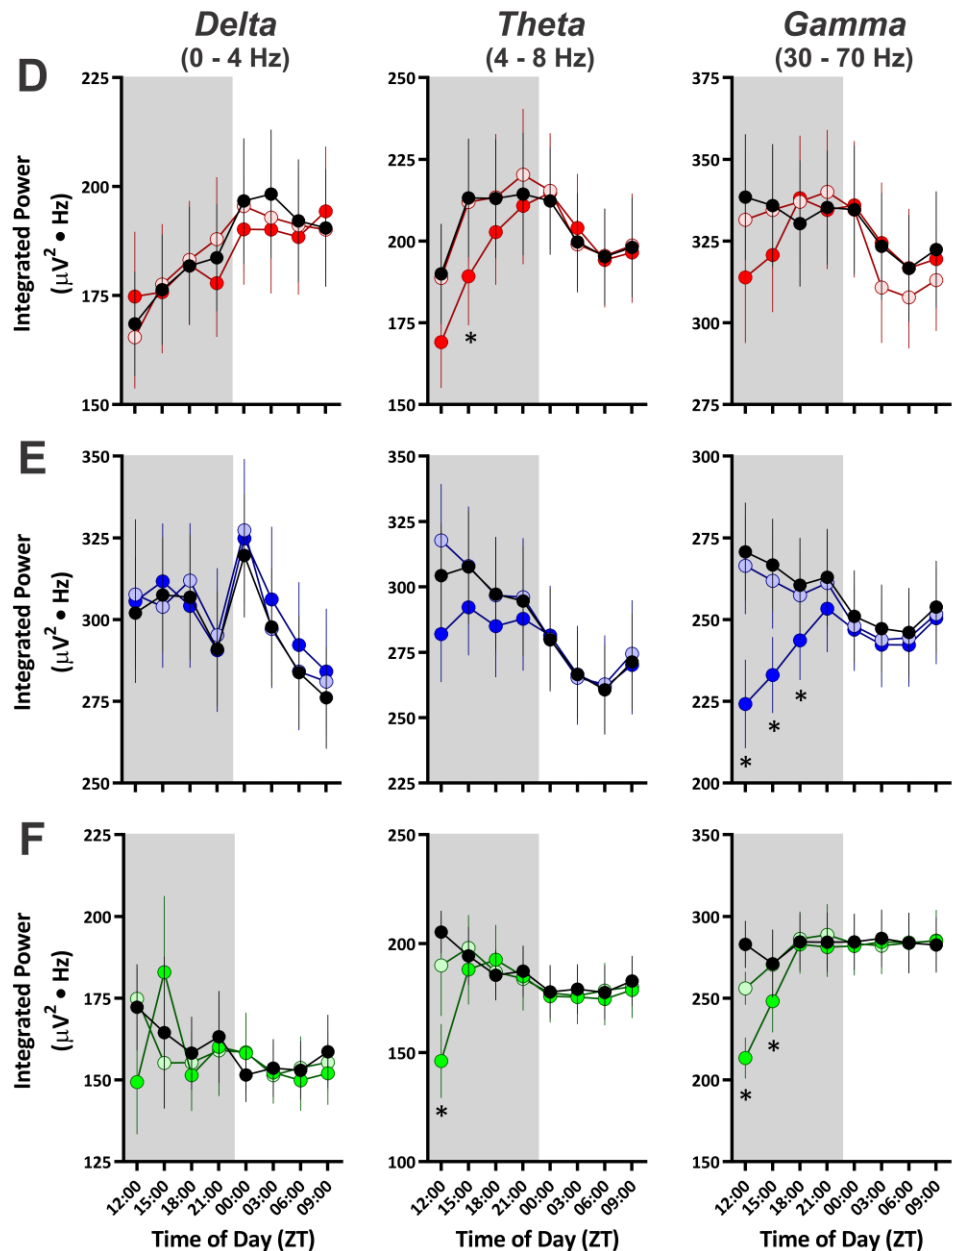

—●— Vehicle    —○— 0.1 mg/kg CP47,497    —●— 1.0 mg/kg CP47,497
