# Supplementary material for: Endocannabinoid Signaling Regulates Sleep Stability
Source: PubMed Central journal article supplement (PMC4816426; doi:10.1371/journal.pone.0152473), 2016-03-31

**A**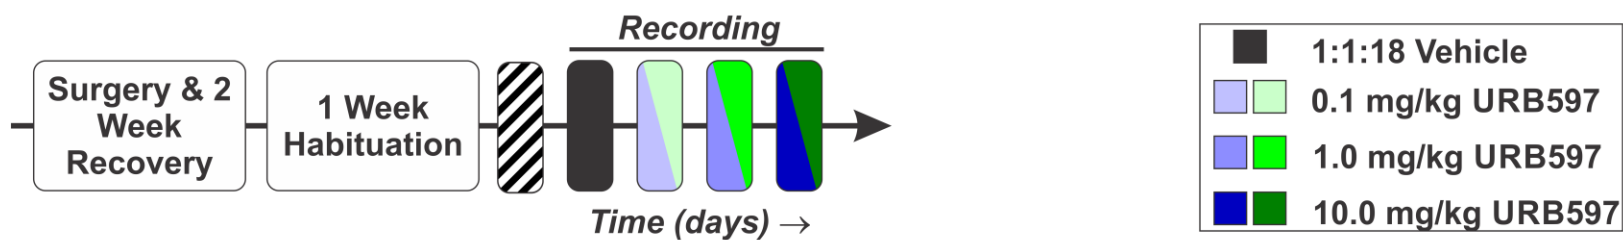**B**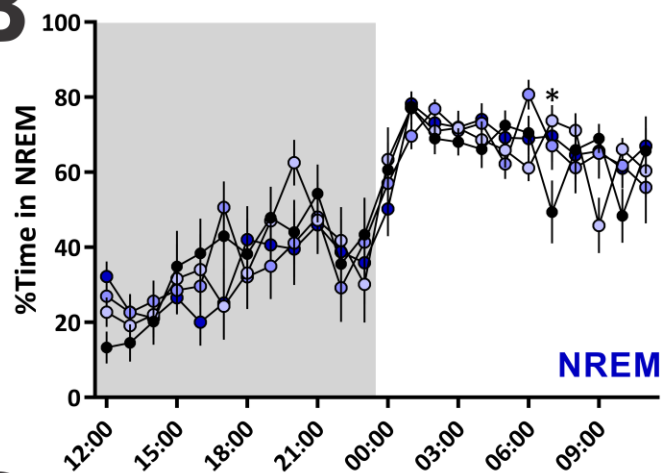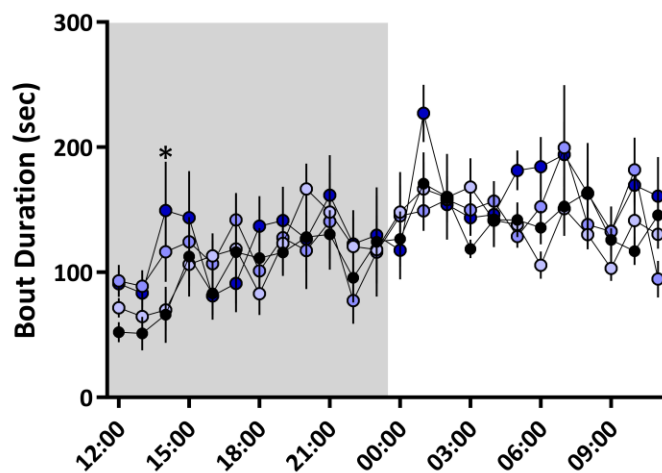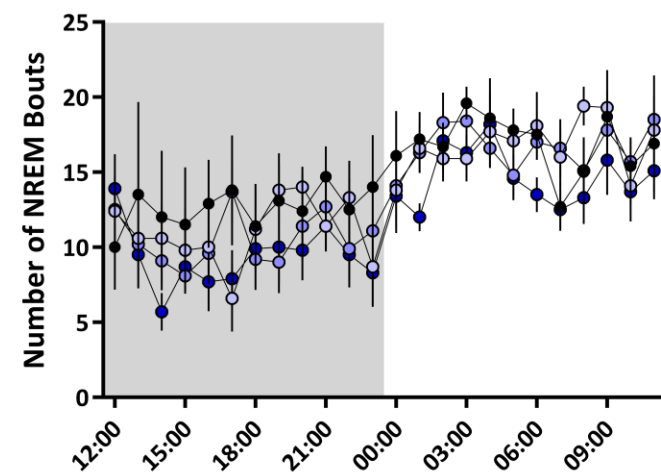**C**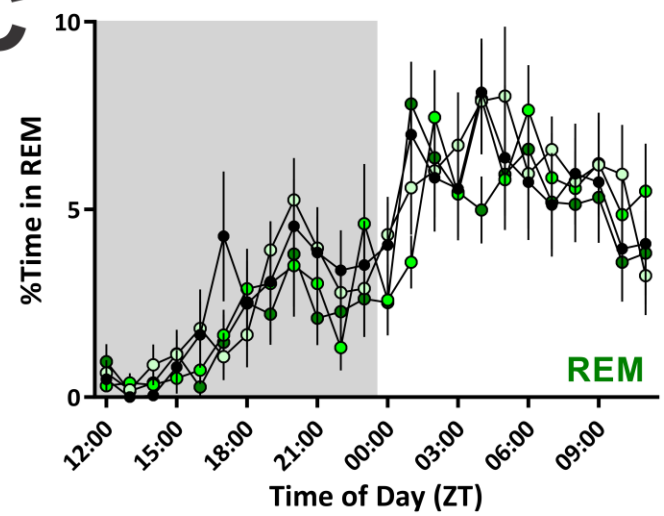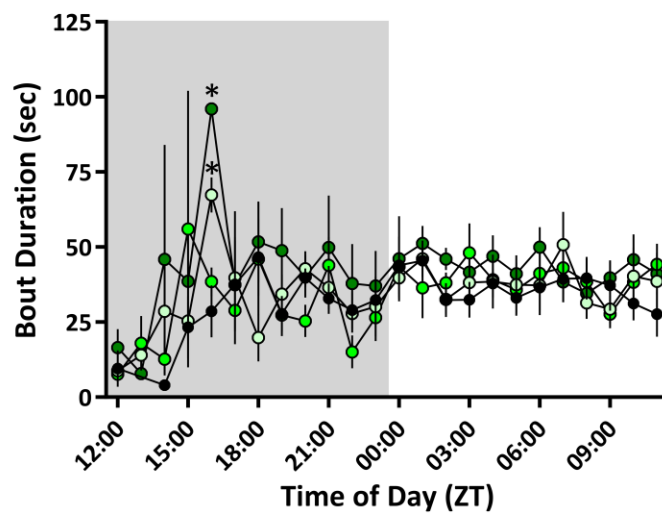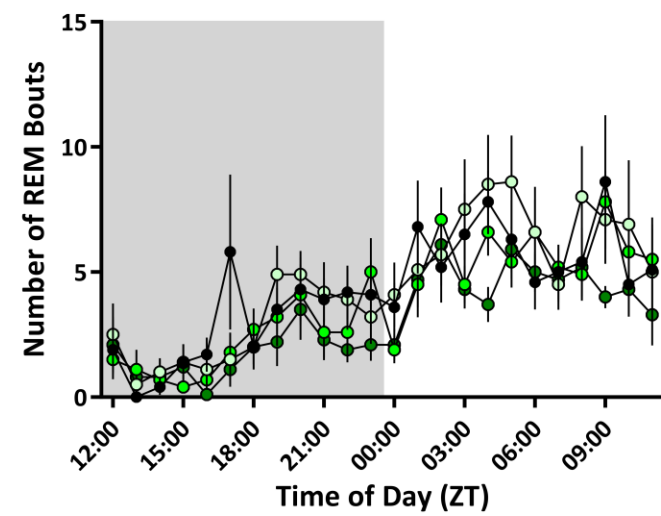

Supplement: pone.0152473.s007.pdf [file pone.0152473.s007.pdf]
